# Supplementary material for: Small Proline-Rich Protein 2A and 2D Are Regulated by the RBM38-p73 Axis and Associated with p73-Dependent Suppression of Chronic Inflammation
Source: MDPI journal article supplement (doi:10.3390/cancers13112829), 2021-06-06
Supplement: s1 [file cancers-1195332-supplementary.pdf › cancers-1195332-supplementary.pdf]

Supplemental Table S1: Wild type (WT) mice (n=56) - survival time, tumor spectrum, steatosis, inflammation, and other abnormalities

| ID       | Gender | Survival (Wks) | Tumor               | Inflammation         | Other abnormalities |
|----------|--------|----------------|---------------------|----------------------|---------------------|
| 5        | F      | 134            | No                  | No                   | No                  |
| 7        | F      | 117            | No                  | No                   | No                  |
| 16       | F      | 100            | No                  | No                   | No                  |
| 22       | F      | 109            | No                  | No                   | No                  |
| 25       | F      | 109            | No                  | No                   | No                  |
| 44       | F      | 90             | No                  | No                   | No                  |
| 55       | F      | 104            | T-LBL               | No                   | No                  |
| 64       | F      | 120            | No                  | No                   | No                  |
| 2        | M      | 127            | No                  | No                   | No                  |
| 3        | M      | 117            | No                  | Liver                | No                  |
| 12       | M      | 127            | No                  | No                   | No                  |
| 13       | M      | 127            | No                  | No                   | No                  |
| 20       | M      | 122            | No                  | No                   | No                  |
| 23       | M      | 122            | No                  | No                   | No                  |
| 26       | M      | 127            | No                  | Liver/Salivary gland | No                  |
| 34       | M      | 124            | DLBCL               | No                   | No                  |
| 37       | M      | 134            | No                  | No                   | No                  |
| 62       | M      | 128            | No                  | No                   | No                  |
| 45       | M      | 133            | No                  | No                   | No                  |
| 49       | M      | 117            | No                  | No                   | No                  |
| 50       | M      | 113            | T-LBL/ DLBCL        | No                   | No                  |
| 56       | M      | 117            | DLBCL               | No                   | No                  |
| 59       | M      | 119            | DLBCL               | No                   | No                  |
| 65       | M      | 106            | No                  | No                   | No                  |
| 69       | M      | 102            | DLBCL               | No                   | Spleen hyperplasia  |
| 70       | M      | 103            | No                  | No                   | Thymus hyperplasia  |
| 71       | M      | 90             | No                  | No                   | No                  |
| 1-24-2   | M      | 83             | No                  | No                   | No                  |
| 2-15-2   | F      | 140            | Lymphoma            | No                   | EMH in liver        |
| 2-19-6   | M      | 132            | No                  | Pancreas             | EMH in Spleen       |
| 2-19-2   | F      | 143            | No                  | No                   | EMH in Spleen       |
| 3-11-3   | M      | 129            | No                  | No                   | No                  |
| 3-28-5   | F      | 85             | No                  | No                   | EMH in spleen       |
| 3-9-7    | M      | 129            | No                  | No                   | No                  |
| 5-12-3   | F      | 99             | Lymphoma            | No                   | EMH in Spleen       |
| 7-9-9    | F      | 116            | No                  | No                   | No                  |
| 8-2-6    | M      | 120            | No                  | No                   | No                  |
| 10-24-7  | F      | 130            | No                  | Pancreas             | EMH in spleen       |
| 10-26-6  | F      | 129            | Histiocytic sarcoma | No                   | EMH in spleen/liver |
| 11-10-7  | M      | 121            | No                  | No                   | No                  |
| 11-7-3   | F      | 121            | No                  | No                   | No                  |
| 11-29-2  | F      | 144            | No                  | No                   | EMH in spleen       |
| 12-2-4   | F      | 113            | No                  | No                   | No                  |
| 12-20-7  | F      | 115            | No                  | No                   | EMH in Spleen       |
| 11-9-6   | F      | 96             | DLBCL               | Skin                 | No                  |
| 1-19-1   | F      | 86             | No                  | Skin                 | No                  |
| 11-10-15 | F      | 105            | No                  | Skin/Pancreas        | No                  |
| 12-25-6  | M      | 111            | No                  | No                   | Hepatocirrhosis     |
| 1-19-5   | F      | 109            | Lymphoma            | No                   | No                  |
| 7-22-4   | M      | 86             | No                  | No                   | No                  |
| 7-22-7   | M      | 126            | No                  | Kidney               | No                  |
| 11       | M      | 111            | N/A                 |                      | Found dead          |
| 42       | M      | 111            | N/A                 |                      | Found dead          |
| 43       | M      | 107            | N/A                 |                      | Found dead          |
| 46       | M      | 117            | N/A                 |                      | Found dead          |
| 52       | M      | 101            | N/A                 |                      | Found dead          |

These mice were from published studies (Yang et al, 2017, PNAS, 114 (43) 11500-11505; Zhang et al, 2017, Genes & Dev, 31:1243-56)

T-LBL: Thymic lymphoblastic lymphoma; DLBCL: Diffuse large B-cell lymphoma; N/A: not applicable; EMH: extramedullary hematopoiesis

Supplemental Table 2 : Rbm38<sup>-/-</sup> mice (n=30) - survival time, tumor spectrum, inflammation, and other abnormalities

| ID       | Gender | Survival (Wks) | Tumor                        | Inflammation                              | Other abnormalities                      |
|----------|--------|----------------|------------------------------|-------------------------------------------|------------------------------------------|
| 1-12-2   | M      | 100            | Lymphoma                     | Pancreas/Lung/Liver/Salivary gland        | EMH in spleen                            |
| 1-24-5   | M      | 83             | -                            | Lung/Liver                                | -                                        |
| 1-11-3   | M      | 100            | -                            | Lung                                      | -                                        |
| 1-11-14  | F      | 110            | Histiocytic sarcoma          | Pancreas/Lung/Liver/Salivary gland/Kidney | EMH in spleen                            |
| 2-14-2   | M      | 109            | -                            | Lung                                      | EMH in spleen                            |
| 2-14-3   | M      | 101            | -                            | -                                         | EMH in spleen                            |
| 2-25-1   | F      | 107            | Lymphoma                     | -                                         | EMH in spleen                            |
| 3-7-2    | F      | 101            | Lymphoma                     | Lung/Liver                                | EMH in spleen                            |
| 3-7-5    | M      | 129            | Lymphoma                     | Kidney/Liver                              | EMH in liver                             |
| 3-7-4    | M      | 129            | Hepatoma                     | Pancreas/Kidney/Liver                     | EMH in spleen                            |
| 6-15-3   | F      | 90             | -                            | Liver/Lung                                | EMH in spleen and liver; Liver steatosis |
| 8-2-3    | F      | 94             | -                            | Kidney                                    | EMH in spleen                            |
| 9-30-4   | M      | 102            | Hemangiosarcoma              | Pancreas/Lung/Liver                       | EMH in spleen and liver                  |
| 10-26-3  | F      | 75             | -                            | Pancreas/Lung                             | EMH in spleen                            |
| 11-3-14  | M      | 77             | -                            | -                                         | EMH in spleen                            |
| 11-10-10 | M      | 124            | Lymphoma and hemangiosarcoma | Pancreas/Lung/Kidney/Salivary gland       | EMH in spleen and liver                  |
| 11-16-14 | M      | 128            | -                            | Lung                                      | EMH in spleen and liver                  |
| 11-16-7  | F      | 125            | Hepatoma and lymphoma        | Pancreas/Lung/Liver/Salivary gland        | EMH in spleen                            |
| 12-19-3  | M      | 123            | Lymphoma                     | Salivary gland                            | EMH in spleen                            |
| 12-19-8  | M      | 118            | Hepatoma                     | Pancreas                                  | EMH in spleen and liver                  |
| 12-19-6  | F      | 87             | -                            | -                                         | -                                        |
| 12-24-2  | M      | 122            | -                            | Liver                                     | Liver steatosis                          |
| 12-28-5  | F      | 102            | Hepatoma and lymphoma        | Pancreas/Lung/Liver/Salivary gland        | EMH in spleen                            |
| 5-13-1+2 | M      | 83             | -                            | Lung/Salivary gland                       | -                                        |
| 11-26-1  | F      | 100            | -                            | Kidney/Lung/Salivary gland                | EMH in spleen, Lymphoid hyperplasia      |
| 8-31-6   | M      | 100            | -                            | Kidney; Lung                              | EMH in spleen                            |
| 7-16-1   | M      | 83             | -                            | Kidney/Lung/Liver/Salivary gland          | EMH in spleen, Liver steatosis           |
| 6-17-2   | M      | 95             | Lymphoma                     | Kidney                                    | EMH in spleen                            |
| 6-9-3    | F      | 96             | Lymphoma                     | Salivary gland                            | EMH in spleen, Lymphoid hyperplasia      |
| 5-13-6   | M      | 101            | Hemangioma                   | Kidney/Lung/liver/Salivary gland          | EMH in spleen, Steatosis                 |

The data of the first 23 mice were from published studies (Zhang et al, 2014, PNAS, 111 (52) 18637-18642)

EMH: extramedullary hematopoiesis

Supplemental Table S3 : Trp73<sup>+/-</sup> mice (n=32)- survival time, tumor spectrum, steatosis, inflammation, and other abnormalities

| ID#       | Gender | Survival<br>(Wks) | Tumor               | Inflammation                              | Other abnormalities                   |
|-----------|--------|-------------------|---------------------|-------------------------------------------|---------------------------------------|
| 1-30-11   | F      | 82                | -                   | Liver/Salivary gland/ kidney/ pancreas    | SWPH/ EMH                             |
| 6-7-14    | M      | 43                | -                   | Liver/lung/Kidney/ Salivary gland/skin    | SWPH / EMH / TH                       |
| 9-23-1    | F      | 77                | Hepatoma            | Liver/pancreas/kidney                     | SWPH                                  |
| 12-14-3   | F      | 46                | -                   | Skin/lung/kidny/liver/salivary gland      | SWPH / EMH                            |
| 5-27-14   | M      | 65                | -                   | Liver/salivary gland                      | SWPH / EMH                            |
| 9-13-11   | F      | 69                | -                   | Liver/Salivary gland/lung/kidney          | SWPH / EMH                            |
| 11-6-1    | F      | 55                | T-LBL               | Liver/Kidney/Salivary gland/pancreas/lung | SWPH / EMH                            |
| 5-3-5     | F      | 105               | -                   | kidney/liver/pancreas/salivary gland      | SWPH / EMH / TH/ Steatosis            |
| 11-6-5    | F      | 88                | DLBCL/Hemangioma    | Liver/Salivary gland                      | SWPH / EMH / TH/ Steatosis            |
| 5-13-2    | M      | 117               | -                   | Liver/Salivary gland/Kidney               | SWPH / EMH / TH/ Steatosis            |
| 11-13-1/5 | M      | 99                | -                   | Liver, Salivary gland                     | -                                     |
| 10-13-12  | F      | 89                | Lymphoma            | -                                         | -                                     |
| 11-5-7    | F      | 102               | DLBCL/Lymphoma      | Kidney/Liver/Cecum                        | SWPH                                  |
| 6-11-6    | M      | 108               | Lymphoma            | Liver                                     | SWPH                                  |
| 10-3-11   | F      | 99                | -                   | Liver/salivary gland/lung                 | SWPH / TH                             |
| 10-22-4   | F      | 86                | Histiocytic sarcoma | Kidney/Salivary gland                     | -                                     |
| 5-28-16   | F      | 120               | Lymphoma            | -                                         | -                                     |
| 11-13-4   | F      | 74                | Lymphoma            | -                                         | -                                     |
| 12-14-1   | F      | 103               | -                   | Liver/pancreas/Salivary gland             | SWPH                                  |
| 1-25-4    | F      | 94                | DLBCL               | -                                         | -                                     |
| 1-15-8    | F      | 69                | -                   | Liver/Kidney/salivary gland               | SWPH                                  |
| 10-31-4   | F      | 88                | Lymphoma            | Liver/Kidney/Lung/Slivary gland           | SRPH / EMH                            |
| 10-14-3/4 | F      | 26                | -                   | Liver/Kidney/lung/Salivary gland          | SRPH / EMH/ Steatosis                 |
| 11-6-4    | F      | 62                | Gastric Adenoma     | Lung/Salivary gland/Liver/Kidney          | SRPH/ EMH                             |
| 9-16-5    | F      | 76                | -                   | Kidney/Liver/Salivary gland               | SRPH/EMH<br>Liver multifocal necrosis |
| 6-22-4    | F      | 80                | -                   | Kidney/Lung/liver                         | SRPH/EMH<br>Liver multifocal necrosis |
| 1-2-5     | M      | 7                 |                     |                                           | Hydrocephalus                         |
| 11-13-2   | M      | 11                | -                   |                                           | Hydrocephalus                         |
| 4-19-1    | F      | 102               | -                   | Liver/Heart                               | SWPH/Follicular hyperplasia           |
| 10-31-5   | F      | 99                | DLBCL               | Kidney/Lung/Salivary gland                | Steatosis                             |
| 10-9-2    | M      | 101               | N/A                 |                                           | Found dead                            |
| 3-10-3    | M      | 108               | N/A                 |                                           | Found dead                            |

The data of the first 28 mice were from published studies ( PNAS, 2019;116(48):24259-24267; J Pathol 2020; 251:284–296)

DLBCL:Diffuse large B-cell lymphoma; EMH: Extramedullary hematopoiesis;

SWPH: Spleen white pulp hyperplasia; SRPH: Spleen red pulp hyperplasia; TH: Thymic hyperplasia

DLBCL: Diffused Large B-cell lymphoma

Supplemental Table S4: Rbm38<sup>-/-</sup>;Trp73<sup>+/-</sup> mice (n=18)- survival time, tumor spectrum, steatosis, inflammation, and other abnormalities

| ID      | Gender | Survival (Wks) | Tumor                         | Inflammation                       | Other abnormalities       |
|---------|--------|----------------|-------------------------------|------------------------------------|---------------------------|
| 11-6-3  | F      | 119            | No                            | Kidney                             | EMH/TH                    |
| 8-10-4  | F      | 68             | No                            | salivary gland                     | EMH/TH                    |
| 7-27-6  | F      | 58             | Lymphoma                      | Kidney/Lung                        | EMH                       |
| 9-7-3   | F      | 89             | Lymphoma                      | Liver/Kidney/Lung/salivary gland   | EMH                       |
| 6-10-3  | F      | 59             | Lymphoma                      | Kidney/Liver/Salivary gland        | EMH/TH                    |
| 9-7-2   | F      | 89             | No                            | Kidney/pancreas/salivary gland     | EMH/TH                    |
| 4-26-9  | F      | 49             | No                            | Kidney/salivary gland/liver/kidney | EMH/TH                    |
| 3-18-5  | F      | 80             | No                            | Salivary gland/GI tract            | EMH/TH/white pulp atrophy |
| 5-13-11 | F      | 74             | No                            | Kidney/Lung/salivary gland         | EMH                       |
| 10-9-1  | F      | 107            | Adenocarcinoma/<br>Hemangioma | Liver/Kidney/lung                  | EMH/SWHP                  |
| 9-7-1   | M      | 39             | No                            | Salivary gland                     | EMH/TH                    |
| 12-8-4  | F      | 77             | Lymphoma                      | Kidney/salivary gland              | EMH                       |
| 11-26-4 | F      | 60             | No                            | Liver/Kidney/Lung/salivary gland   | EMH/SWHP/TH               |
| 6-17-3  | M      | 45             | No                            | Kidney/salivary gland              | EMH/SWHP/TH               |
| 3-17-1  | M      | 92             | No                            | Kidney/Lung/liver/salivary gland   | EMH                       |
| 8-31-2  | M      | 86             | No                            | Kidney/Lung/Salivary gland         | EMH/SWHP/Steatosis        |
| 6-9-5   | F      | 97             | No                            | Liver/Kidney/Lung/salivary gland   | EMH/SWHP                  |
| 10-16-7 | F      | 77             | No                            | Liver/Lung/Salivary gland          | EMH/SWHP                  |

EMH: extramedullary hematopoiesis; SWHP: Spleen White Pulp Hyperplasia; TH: Thymic Hyperplasia

Supplemental Fig. 1

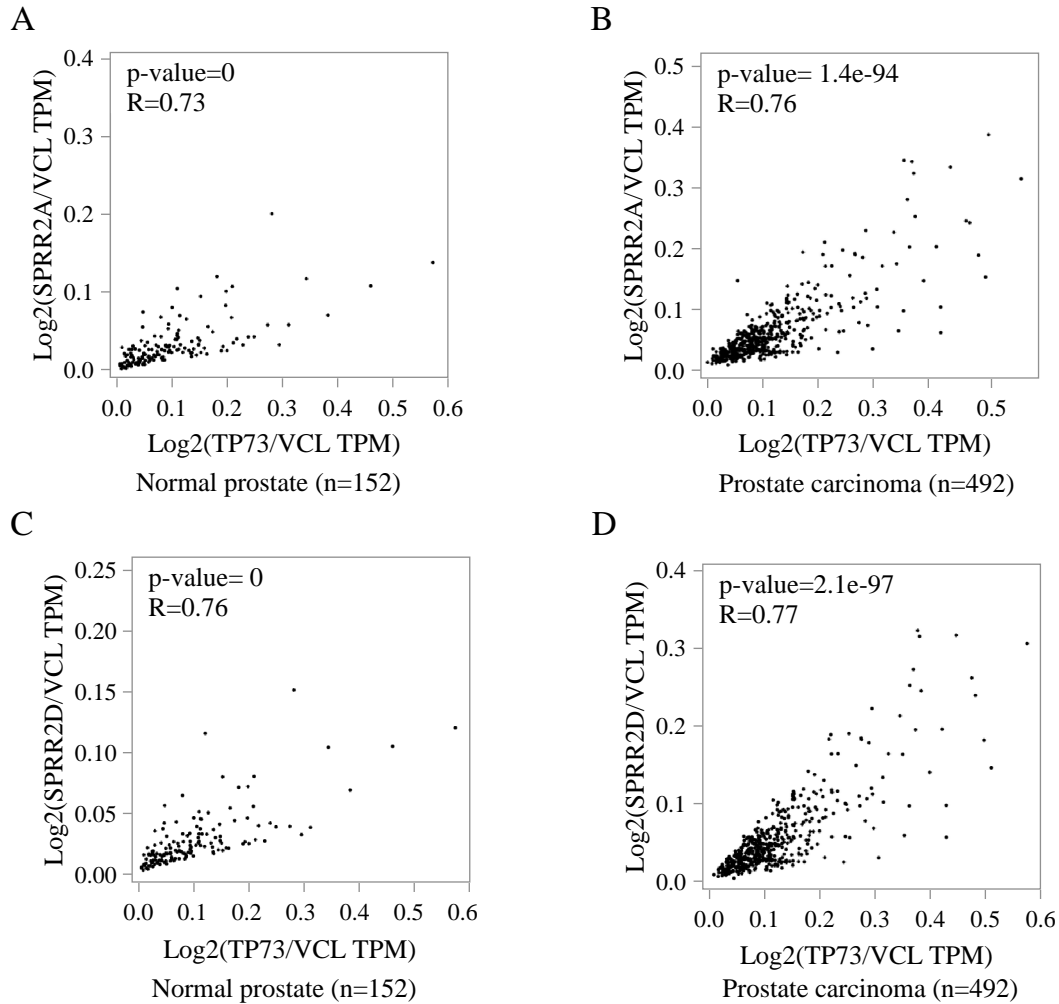

Supplemental Figure 1 Correlation of p73 and SPRR2A/2D expression in normal prostate and prostate carcinomas

(A-B) p73 expression is associated with SPRR2A expression in normal prostate tissues (A) and prostate carcinomas (B). Statistical analysis suggests a strong correlation between p73 and SPRR2A in normal liver tissues (Pearson's  $r = 0.73$ ) and prostate carcinomas (Pearson's  $r = 0.76$ ).

(C-D) p73 expression is associated with SPRR2D expression in normal prostate tissues (C) and prostate carcinomas (D). Statistical analysis suggests a strong correlation between p73 and SPRR2D in normal prostate tissues (Pearson's  $r = 0.76$ ) and prostate carcinomas (Pearson's  $r = 0.77$ ).
